# Supplementary material for: Clinical factors associated with rapid treatment of sepsis
Source: PubMed Central journal article supplement (PMC8101717; doi:10.1371/journal.pone.0250923), 2021-05-06
Supplement: pone.0250923.s001.pdf [file pone.0250923.s001.pdf]

## S1 Appendix – Examples of SHAP Value Representations

Patient A: Age=76, White, Male, Non-Hispanic, Non-Hypotensive,  
blood culture ordered, antibiotics administered, initial lactated taken within 3 hour

| variable                  | value       | SHAP value | cumulative log(odds) | predicted probability |
|---------------------------|-------------|------------|----------------------|-----------------------|
| Heart rate_min            | 109         | 0.358      | 0.358                | 0.589                 |
| DBP_min                   | 79          | 0.326      | 0.684                | 0.665                 |
| Bilirubin_inc_initial     | 8.6         | 0.313      | 0.997                | 0.731                 |
| Glasgow Coma Scale_max    | 0           | 0.230      | 1.227                | 0.773                 |
| SBP_min                   | 95          | -0.214     | 1.013                | 0.734                 |
| SpO2_min                  | 100         | 0.214      | 1.227                | 0.773                 |
| WBC perc band_initial     | 10          | 0.212      | 1.439                | 0.808                 |
| Heart rate_initial        | 162         | 0.195      | 1.634                | 0.837                 |
| Sodium_initial            | 132         | -0.154     | 1.480                | 0.815                 |
| INR_initial               | 2.1         | -0.153     | 1.327                | 0.790                 |
| ...remaining 95 variables | 132,2.1,... | 0.146      | 1.473                | <b>0.813</b>          |

Patient B: Age=87, White, Male, Non-Hispanic, Hypotensive,  
blood culture ordered, antibiotics administered, initial lactated taken within 3 hour,  
and 2 liter fluid given within 2 hours since initiation

| variable                  | value        | SHAP value | cumulative log(odds) | predicted probability |
|---------------------------|--------------|------------|----------------------|-----------------------|
| Creatinine_initial        | 2.02         | 0.409      | 0.409                | 0.601                 |
| Urine Output_initial      | 50           | -0.398     | 0.012                | 0.503                 |
| SBP_min                   | 89           | 0.394      | 0.405                | 0.600                 |
| Fibrinoge_initial         | 357          | -0.273     | 0.133                | 0.533                 |
| MAP_mean                  | 67.7         | 0.238      | 0.370                | 0.592                 |
| CO2_max                   | NA           | 0.219      | 0.590                | 0.643                 |
| Glasgow Coma Scale_max    | 0            | 0.211      | 0.801                | 0.690                 |
| Heart rate_initial        | 95           | -0.207     | 0.594                | 0.644                 |
| Respiratory rate_max      | 26           | 0.202      | 0.796                | 0.689                 |
| Chronic DX_CKD            | 0            | 0.192      | 0.988                | 0.729                 |
| ...remaining 96 variables | 66.3,0.8,... | -0.023     | 0.965                | <b>0.724</b>          |

For each patient in the example, the “SHAP value” is the change of log odds for the outcome (rapid completion of treatment) for certain variable taking the corresponding “value”. The variables are ordered by their SHAP values with “cumulative log(odds)” summing up the overall changes of log odds along the list. The “cumulative log(odds)” is finally transformed to “predicted probability” using sigmoid function, i.e.,  $1/(1 + \exp(-x))$ .
